# Supplementary material for: Comparative Tensile Properties and Collagen Patterns in Domestic Cat (Felis catus) and Dog (Canis lupus familiaris) Ovarian Cortical Tissues
Source: MDPI journal article supplement (doi:10.3390/bioengineering10111285), 2023-11-04
Supplement: s1 [file s1]

**Supplemental Table S1. Details of the animals used in the study, with ‘na’ indicating where data are not available.**

| Species | Age (yr) | Breed               | Age Category | Note      |
|---------|----------|---------------------|--------------|-----------|
| Cat     | 0.5      | -                   | Adult        |           |
|         | 0.5      | -                   | Adult        |           |
|         | 0.58     | -                   | Adult        |           |
|         | 1        | -                   | Adult        | in heat   |
|         | 1.5      | -                   | Adult        |           |
|         | 2        | -                   | Adult        |           |
|         | na       | -                   | Adult        | in heat   |
|         | 0.15     | -                   | Prepubertal  | MMP study |
|         | 0.15     | -                   | Prepubertal  | MMP study |
|         | 0.15     | -                   | Prepubertal  | MMP study |
|         | 0.19     | -                   | Prepubertal  | MMP study |
|         | 0.25     | -                   | Prepubertal  |           |
|         | 0.25     | -                   | Prepubertal  | MMP study |
|         | 0.33     | -                   | Prepubertal  |           |
|         | 0.33     | -                   | Prepubertal  | MMP study |
|         | 0.42     | -                   | Prepubertal  |           |
|         | 0.5      | -                   | Prepubertal  |           |
|         | na       | -                   | Prepubertal  |           |
| Dog     | 0.92     | na                  | Adult        |           |
|         | 1        | Terrier             | Adult        |           |
|         | 1        | Pitbull             | Adult        |           |
|         | 1        | Shih tzu            | Adult        |           |
|         | 2        | Labrador            | Adult        |           |
|         | 2        | Pitbull             | Adult        |           |
|         | 3        | Chihuahua           | Adult        |           |
|         | na       | German Shepherd     | Adult        |           |
|         | 0.33     | Terrier X           | Prepubertal  |           |
|         | 0.42     | na                  | Prepubertal  | MMP study |
|         | 0.42     | Boston Terrier      | Prepubertal  | MMP study |
|         | 0.42     | Boston Terrier      | Prepubertal  | MMP study |
|         | 0.50     | Maltese             | Prepubertal  |           |
|         | 0.50     | na                  | Prepubertal  |           |
|         | 0.50     | Boston Terrier      | Prepubertal  |           |
|         | 0.50     | Jack Russel Terrier | Prepubertal  |           |
|         | 0.58     | Blue Tic            | Prepubertal  |           |
|         | 0.58     | Border Collie       | Prepubertal  |           |
|         | 0.58     | Terrier             | Prepubertal  | MMP study |
|         | 0.58     | Pitbull             | Prepubertal  | MMP study |
|         | 0.67     | Boxer               | Prepubertal  |           |
|         | 0.83     | na                  | Prepubertal  | MMP study |
|         | 0.83     | Labrador            | Prepubertal  | MMP study |
|         | na       | Chihuahua           | Prepubertal  |           |
|         | na       | Hound               | Prepubertal  |           |

## Supplemental Figures

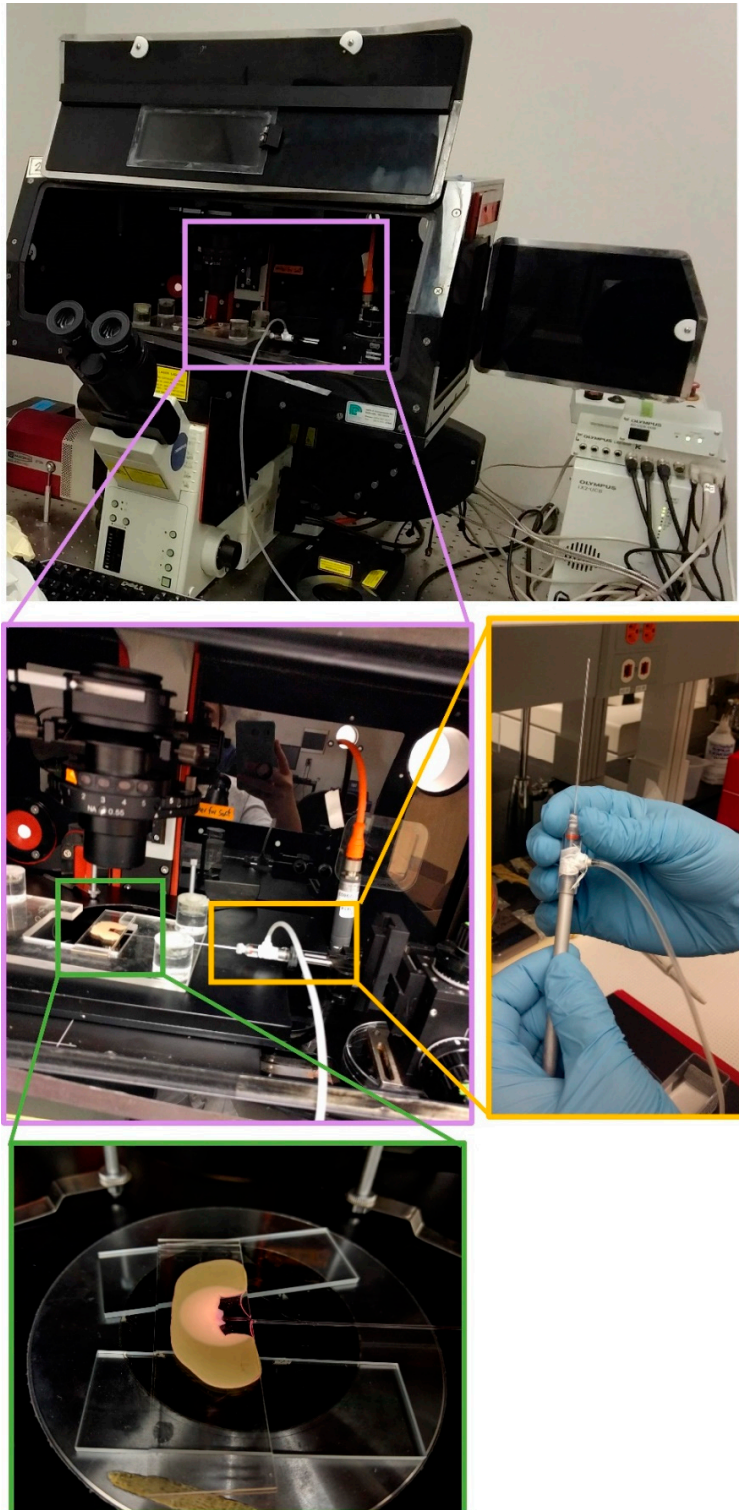

**Supplemental Figure S1.** Micropipette aspiration setup for tensile testing, with inverted microscope fitted with on-stage chamber to minimize air/light contamination during image

capture, and anti-vibration table. Experiment setup (purple box) included tissue sample sandwiched between glass slides (green box) with glass capillary attached to pneumatic transducer introduced via micromanipulation apparatus between the slides to contact the tissue.

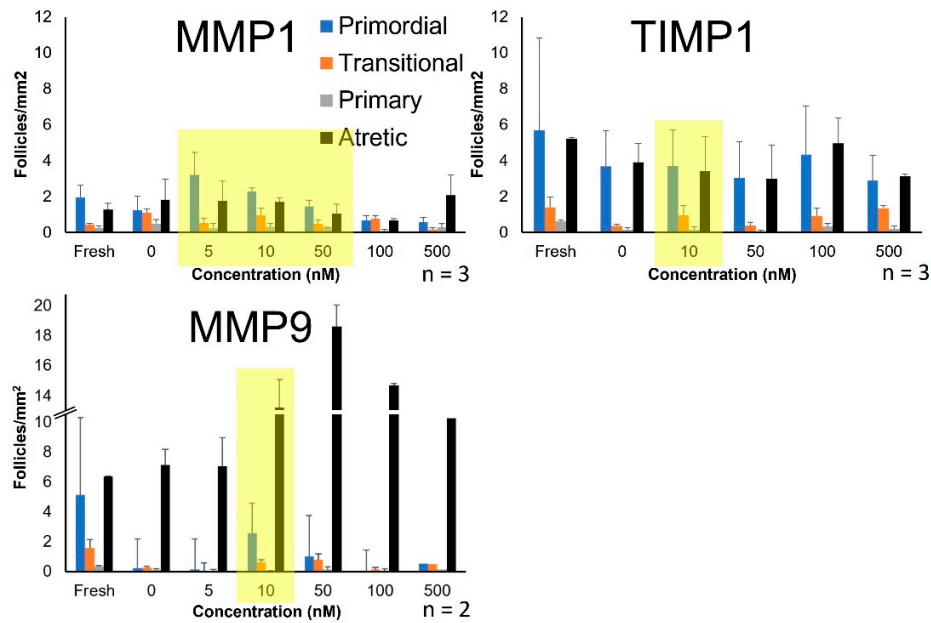

**Supplemental Figure S2.** Density of primordial, transitional, primary, and atretic follicles in domestic cat ovarian tissue after 14-day culture in various concentrations (0, 10, 50, 100, and 500 ng/ml) of MMP1, TIMP1, and MMP9. Yellow highlights indicate concentration regions wherein high proportions of primordial and transitional stage follicles were maintained, while minimizing proportions of atretic follicles for toxicological assessment of MMP and TIMPs.

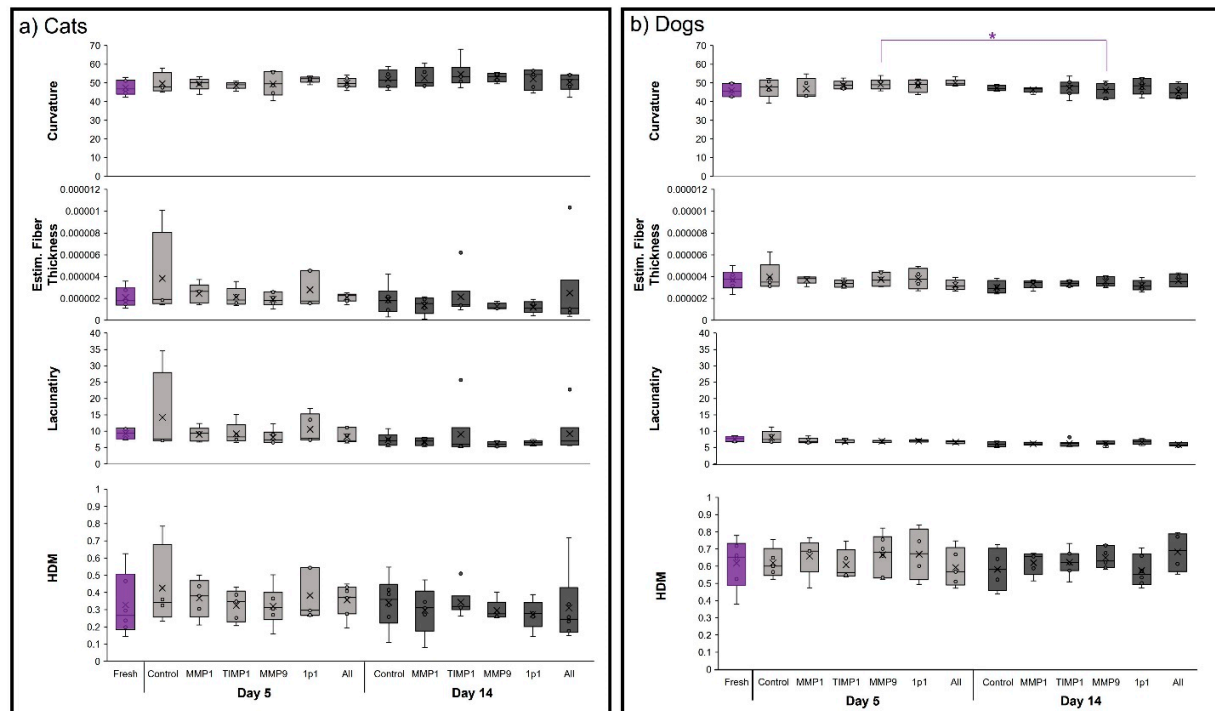

**Supplemental Figure S3. Additional TWOMBLI results for a) cats (n = 6) and b) dogs (n = 7) analyzed for collagen patterns, including curvature, estimated fiber thickness, lacunarity, and high-density matrix (HDM). Asterisks (\*) denote differences between treatments, with  $P < 0.05$  via non-parametric Wilcoxon test.**
